# Supplementary figures and images for: Depth profiles of amino acids in porewater of sediments from the Norwegian-Greenland sea
Source: MDPI journal article supplement (doi:10.3390/biom12121877), 1994-01-01

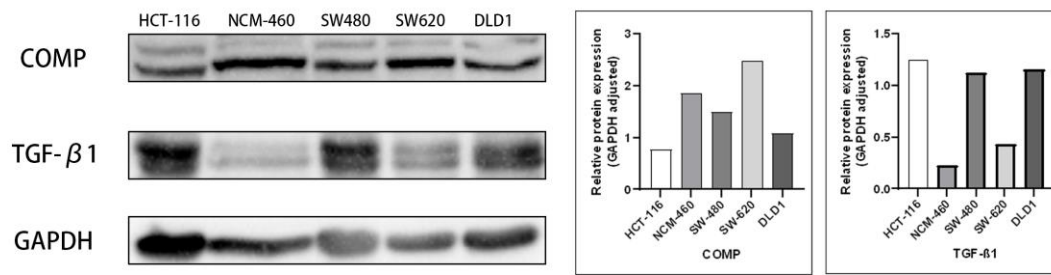

Supplement: s1 [file Figure S1.pdf › Figure S1.pdf]
